# Supplementary material for: Porous sorbents for the capture of radioactive iodine compounds: a review
Source: Royal Society of Chemistry journal article supplement (doi:10.1039/c8ra04775h), 2018-01-01
Supplement: c8ra04775h1.pdf [file c8ra04775h1.pdf]

## Supporting information

### **Porous sorbents for the capture of iodine radioactive compounds: A review**

Joffrey Huve<sup>a,b</sup>, Andrey Ryzhikov<sup>a,b</sup>, Habiba Nouali<sup>a,b</sup>, Virginie Lalia<sup>c</sup>, Grégoire Augé<sup>d</sup> and T. Jean Daou<sup>a,b\*</sup>

<sup>a</sup>. Université de Haute Alsace (UHA), Axe Matériaux à Porosité Contrôlée (MPC), CNRS IS2M UMR 7361, 3 bis rue Alfred Werner, F-68093, Mulhouse, France

<sup>b</sup>. Université de Strasbourg, France

<sup>c</sup>. ONET Technologies, 270 chemin des agriculteurs, 26700, Pierrelatte, France

<sup>d</sup>. ONET Technologies, 36 boulevard de l'océan, 13258, Marseille Cedex 9, France

\* jean.daou@uha.fr

**Table 1** – Summary of the iodine capture performances of TEDA-impregnated activated carbons

| Study                                    | Impregnation (wt.%)                | Iodine/methyl iodide concentration ( $I_2$ , $CH_3I$ ) | T (°C) | R.H. (%) | Capture performances               |                                    |
|------------------------------------------|------------------------------------|--------------------------------------------------------|--------|----------|------------------------------------|------------------------------------|
| Deuber et al. 1982 <sup>1</sup>          | TEDA (nd <sup>1</sup> )            | 1 mg.m <sup>-3</sup>                                   | 30     | 98       | P = 5.2*10 <sup>-4</sup> %         |                                    |
|                                          |                                    |                                                        | 130    | 2        | P = 1.8*10 <sup>-3</sup> %         |                                    |
| Kitani et al. 1972 <sup>2</sup>          | HMTA (10 wt.%)                     | 15 ppm<br>(Flow rate : 24 cm.s <sup>-1</sup> )         | 70     | 90       | P = 29.7 % (E = 70.3 %)            |                                    |
|                                          | TEDA (10 wt.%)                     |                                                        |        |          | P = 9.2 % (E = 90.8 %)             |                                    |
| Deuber et al. 1986 <sup>3</sup>          | TEDA (nd)                          | 1 mg.m <sup>-3</sup>                                   | 130    | 2        | P = 3.7*10 <sup>-3</sup> %         |                                    |
|                                          |                                    |                                                        | 180    | <1       | P = 1.4*10 <sup>-4</sup> %         |                                    |
|                                          |                                    |                                                        | 130    | 2        | P = 3.4*10 <sup>-4</sup> %         |                                    |
|                                          |                                    |                                                        | 180    | <1       | P = 5.0*10 <sup>-5</sup> %         |                                    |
| Deitz et al. 1987 <sup>4</sup>           | TEDA (5 wt.%)                      | nd                                                     | 30     | >90      | P = 1.51 ± 0.84 %                  |                                    |
| Park et al. 1993 <sup>5</sup>            | /                                  | 0.018 mol.m <sup>-3</sup>                              | 30     | nd       | Q = 176 g/kg <sub>adsorbents</sub> |                                    |
|                                          |                                    | 0.460 mol.m <sup>-3</sup>                              |        |          | Q = 775 g/kg <sub>adsorbents</sub> |                                    |
|                                          |                                    | 0.011 mol.m <sup>-3</sup>                              |        |          | Q = 179 g/kg <sub>adsorbents</sub> |                                    |
|                                          |                                    | 0.886 mol.m <sup>-3</sup>                              |        |          | Q = 843 g/kg <sub>adsorbents</sub> |                                    |
|                                          |                                    | 0.019 mol.m <sup>-3</sup>                              |        |          | Q = 215 g/kg <sub>adsorbents</sub> |                                    |
| Park et al. 2001 <sup>6</sup>            | /                                  | 0.004 – 0.06 mol.m <sup>-3</sup>                       | 30     | Sec      | Q = 759 g/kg <sub>adsorbents</sub> |                                    |
|                                          |                                    |                                                        |        |          | Q = 529 g/kg <sub>adsorbents</sub> |                                    |
|                                          |                                    |                                                        |        |          | Q = 350 g/kg <sub>adsorbents</sub> |                                    |
|                                          |                                    |                                                        |        |          | Q = 161 g/kg <sub>adsorbents</sub> |                                    |
|                                          |                                    |                                                        |        |          | Q = 74 g/kg <sub>adsorbents</sub>  |                                    |
|                                          |                                    |                                                        |        |          | Q = 35 g/kg <sub>adsorbents</sub>  |                                    |
|                                          |                                    |                                                        |        |          | Q = 21 g/kg <sub>adsorbents</sub>  |                                    |
|                                          |                                    |                                                        |        |          | TEDA (6.5 %m)                      | Q = 470 g/kg <sub>adsorbents</sub> |
|                                          |                                    |                                                        |        |          |                                    | Q = 320 g/kg <sub>adsorbents</sub> |
|                                          |                                    |                                                        |        |          |                                    | Q = 215 g/kg <sub>adsorbents</sub> |
|                                          |                                    |                                                        |        |          |                                    | Q = 155 g/kg <sub>adsorbents</sub> |
| Q = 130 g/kg <sub>adsorbents</sub>       |                                    |                                                        |        |          |                                    |                                    |
| /                                        | Q = 105 g/kg <sub>adsorbents</sub> |                                                        |        |          |                                    |                                    |
|                                          | Q = 105 g/kg <sub>adsorbents</sub> |                                                        |        |          |                                    |                                    |
|                                          | Q = 105 g/kg <sub>adsorbents</sub> |                                                        |        |          |                                    |                                    |
|                                          | Q = 105 g/kg <sub>adsorbents</sub> |                                                        |        |          |                                    |                                    |
|                                          | Q = 105 g/kg <sub>adsorbents</sub> |                                                        |        |          |                                    |                                    |
|                                          | Q = 105 g/kg <sub>adsorbents</sub> |                                                        |        |          |                                    |                                    |
| González-García et al. 2011 <sup>7</sup> | /                                  | 1.75 g.m <sup>-3</sup>                                 | 30     | 95       | P = 0.70 % (E = 99.3 %)            |                                    |
|                                          | /                                  |                                                        |        |          | P = 27.2 % (E = 72.8 %)            |                                    |
|                                          | TEDA (5 wt.%)                      |                                                        |        |          | P = 1.90 % (E = 98.1 %)            |                                    |
|                                          | TEDA (10 wt.%)                     |                                                        |        |          | P = 3.70 % (E = 96.3 %)            |                                    |
|                                          | /                                  |                                                        |        |          | P = 41.4 % (E = 58.6 %)            |                                    |
|                                          | TEDA (5 wt.%)                      |                                                        |        |          | P = 5.90 % (E = 94.1 %)            |                                    |
| TEDA (10 wt.%)                           | P = 7.70 % (E = 92.3 %)            |                                                        |        |          |                                    |                                    |

<sup>1</sup> nd : Not defined

**Table 2** – Summary of the iodine capture performances of KI-impregnated activated carbons

| Study                             | Impregnation (wt.%)                                  | Iodine/methyl iodide concentration ( $I_2$ , $CH_3I$ ) | T (°C)                               | R.H. (%) | Capture performances                         |
|-----------------------------------|------------------------------------------------------|--------------------------------------------------------|--------------------------------------|----------|----------------------------------------------|
| Kitani et al. 1972 <sup>2</sup>   | KI (10 wt.%)                                         | 15 ppm, Flow : 24 cm.s <sup>-1</sup>                   | 70                                   | 90       | P = 6.4 % (E = 93.6 %)                       |
|                                   | KI (5 wt.%)                                          | 16 ppm, Flow : 24 cm.s <sup>-1</sup>                   | 25                                   | 90       | P = 2.2 % (E = 97.8 %)                       |
| US4016242A 1977 <sup>8</sup>      | KIO <sub>3</sub> + KI (0.5 - 4 wt.%) + HMTA (1 wt.%) | 5.49 mg iodine in air flow                             | nd                                   | 96       | P = 0.16 – 0.50 %                            |
| Deitz et al. 1987 <sup>4</sup>    | KI                                                   | nd <sup>2</sup>                                        | 30                                   | 95       | P = 1.4 ± 0.08 %                             |
|                                   | KI + TEDA                                            |                                                        |                                      |          | P = 0.1 ± 0.84 %                             |
| Decourcière 1981 <sup>9</sup>     | KI (1 wt.%)                                          | nd                                                     | nd                                   | 40       | DF 10 <sup>4</sup>                           |
|                                   |                                                      |                                                        |                                      | 96       | DF < 10 <sup>2</sup>                         |
| Deuber et al. 1982 <sup>1</sup>   | KI                                                   | 1 mg.m <sup>-3</sup>                                   | 30                                   | 98       | P = 6.5.10 <sup>-4</sup> %                   |
|                                   |                                                      |                                                        | 130                                  | 2        | P = 1.5.10 <sup>-4</sup> %                   |
| Qi-dong et al. 1984 <sup>10</sup> | KI (2 wt.%) + TEDA (2 wt.%)                          | 8 ppmv <sup>3</sup> , Flow 28 cm.s <sup>-1</sup>       | 40                                   | 95       | DF 10 <sup>4</sup>                           |
|                                   |                                                      |                                                        | 50                                   |          | DF 10 <sup>3.5</sup>                         |
|                                   |                                                      |                                                        | 60                                   |          | DF 10 <sup>3</sup>                           |
|                                   |                                                      |                                                        | 70                                   |          | DF 10 <sup>2.4</sup>                         |
|                                   |                                                      |                                                        | 40                                   |          | DF 10 <sup>4</sup>                           |
|                                   |                                                      |                                                        | 8.7 ppmv, Flow 28 cm.s <sup>-1</sup> |          | 40                                           |
| 60                                | DF 10 <sup>2.9</sup>                                 |                                                        |                                      |          |                                              |
| Chien et al. 2011 <sup>11</sup>   | /                                                    | nd                                                     | nd                                   | nd       | P = 38.7 % (E = 61.3 %)                      |
|                                   | /                                                    |                                                        |                                      |          | P = 41.0 % (E = 59 %)                        |
|                                   | /                                                    |                                                        |                                      |          | P = 27.7 % (E = 72.3 %)                      |
|                                   | /                                                    |                                                        |                                      |          | P = 29.1 % (E = 70.9 %)                      |
|                                   | KI (5 wt.%)                                          |                                                        |                                      |          | P = 0 % (E = 100 %)                          |
| Zhou et al. 2014 <sup>12</sup>    | KI (>1 wt.%)                                         | nd                                                     | ≤ 40                                 | ≤ 32     | P < 0.1 % (E > 99.9 %)<br>DF 10 <sup>5</sup> |

<sup>2</sup> nd : not defined<sup>3</sup> ppmv : 1 ppmv = 1 µL/L

**Table 3** – Summary of the iodine capture performances of silver-exchanged zeolites

| Study/Topic                                                                                                      | Zeolites (wt.%Ag)                  | Iodine/methyl iodide concentration (I <sub>2</sub> , CH <sub>3</sub> I) | Operating conditions                                            | T (°C)                             | R.H. (%)                 | Capture performances                                                          |                                  |
|------------------------------------------------------------------------------------------------------------------|------------------------------------|-------------------------------------------------------------------------|-----------------------------------------------------------------|------------------------------------|--------------------------|-------------------------------------------------------------------------------|----------------------------------|
| Pence et al. 1970 <sup>13</sup><br>/Cation influence                                                             | AgX                                | CH <sub>3</sub> I (0.1 - 10 µg/m <sup>3</sup> )                         | Superficial velocity <sup>4</sup><br>v = 92 ft/min <sup>5</sup> | 25                                 | 90                       | E > 99.9%                                                                     |                                  |
|                                                                                                                  | CdX                                |                                                                         |                                                                 |                                    |                          | E = 1.4%                                                                      |                                  |
|                                                                                                                  | CuX                                |                                                                         |                                                                 |                                    |                          | E = 1.5 %                                                                     |                                  |
|                                                                                                                  | PbX                                |                                                                         |                                                                 |                                    |                          | E = 0.8%                                                                      |                                  |
| Pence et al. 1970 <sup>13</sup><br>/Cation influence                                                             | NaX                                | I <sub>2</sub> generated from<br>Dushman reaction                       | Superficial velocity<br>v = 46 ft/min                           | 22                                 | 90                       | E = 4.24%                                                                     |                                  |
|                                                                                                                  | PbX                                |                                                                         |                                                                 |                                    |                          | E = 7.21%                                                                     |                                  |
|                                                                                                                  | TiX                                |                                                                         |                                                                 |                                    |                          | E = 27.37                                                                     |                                  |
|                                                                                                                  | AgX                                |                                                                         |                                                                 |                                    |                          | E > 99.9%                                                                     |                                  |
|                                                                                                                  | CuX                                |                                                                         |                                                                 |                                    |                          | E = 0.82                                                                      |                                  |
| Pence et al. 1970 <sup>13</sup><br>/Humidity influence                                                           | AgX                                | CH <sub>3</sub> I (0.1 - 10 µg/m <sup>3</sup> )                         | Superficial velocity<br>v = 46 ft/min                           | 25                                 | 90                       | E > 99.9%                                                                     |                                  |
|                                                                                                                  |                                    |                                                                         |                                                                 |                                    | 95                       | E > 99.9%                                                                     |                                  |
|                                                                                                                  |                                    |                                                                         |                                                                 |                                    | 100                      | E > 99.9%                                                                     |                                  |
|                                                                                                                  |                                    |                                                                         |                                                                 |                                    | 90                       | E = 94%                                                                       |                                  |
|                                                                                                                  |                                    |                                                                         |                                                                 |                                    | 95                       | E = 92%                                                                       |                                  |
| Evans 1978 <sup>14</sup><br>/Irradiation influence<br>onto the iodine<br>desorption                              | AgX                                | I <sub>2</sub> charged at 6.5 mg/g<br>beforehand                        | Radiation:<br>1.5.10 <sup>7</sup> rad/h.<br>v = 55 ft/min       | 35 ≤ T ≤<br>80                     | 20 ≤<br>R.H. ≤<br>95     | Total penetration P =<br>0.743 % (E = 99.257)<br>Desorption rate : < 0.1<br>% |                                  |
|                                                                                                                  |                                    |                                                                         |                                                                 |                                    |                          | Holladay 1979 <sup>15</sup><br>/NO <sub>2</sub> poisoning<br>influence        | Ag <sup>+</sup> MOR              |
| 2%NO                                                                                                             | Q = 129 g/kg <sub>adsorbents</sub> |                                                                         |                                                                 |                                    |                          |                                                                               |                                  |
| 2%NO <sub>2</sub>                                                                                                | Q = 68 g/kg <sub>adsorbents</sub>  |                                                                         |                                                                 |                                    |                          |                                                                               |                                  |
| 2%NO +<br>2%NO <sub>2</sub> +<br>2%H <sub>2</sub> O                                                              | Q = 119 g/kg <sub>adsorbents</sub> |                                                                         |                                                                 |                                    |                          |                                                                               |                                  |
| Vance et al. 1982 <sup>16</sup><br>/Zeolite nature                                                               | AgX (37)<br>AgY (28)<br>AgMOR (20) | nd                                                                      | nd                                                              | 130                                | Dry                      |                                                                               |                                  |
|                                                                                                                  |                                    |                                                                         |                                                                 |                                    |                          | Q = 210 g/kg <sub>adsorbents</sub>                                            |                                  |
|                                                                                                                  |                                    |                                                                         |                                                                 |                                    |                          | Q = 160 g/kg <sub>adsorbents</sub>                                            |                                  |
| Vance et al. 1982 <sup>16</sup><br>/Temperature influence<br>*AgI stability at high<br>temperature               | AgY (28)                           | nd                                                                      | nd                                                              | 130                                | nd                       | Q = 210 g/kg <sub>adsorbents</sub>                                            |                                  |
|                                                                                                                  |                                    |                                                                         |                                                                 | 600*                               |                          | Q = 60 g/kg <sub>adsorbents</sub>                                             |                                  |
|                                                                                                                  |                                    |                                                                         |                                                                 | 1000*                              |                          | Q = 50 g/kg <sub>adsorbents</sub>                                             |                                  |
|                                                                                                                  |                                    |                                                                         |                                                                 | 1300*                              |                          | Q = 50 g/kg <sub>adsorbents</sub>                                             |                                  |
| Scheele et al. 1983 <sup>17</sup><br>/Superficial velocity<br>influence                                          | AgMOR                              | 1.3.10 <sup>-5</sup> mol.L <sup>-1</sup> CH <sub>3</sub> I              | Superficial velocity<br>v=3.75 m/min                            | 86                                 | 5.10-4<br>mol.L-1<br>H2O | Q = 71 g/kg <sub>adsorbents</sub>                                             |                                  |
|                                                                                                                  |                                    |                                                                         |                                                                 | 200                                |                          | Q = 217 g/kg <sub>adsorbents</sub>                                            |                                  |
|                                                                                                                  |                                    |                                                                         |                                                                 | Superficial velocity<br>v=15 m/min |                          | 86                                                                            | Q < 7 g/kg <sub>adsorbents</sub> |
| Belapurkar et al. 1984 <sup>18</sup><br>/Temperature influence<br>(Hydrated zeolites.<br>18% m H <sub>2</sub> O) | AgX (16)                           | 7.5 µmol/ml CH <sub>3</sub> I                                           | Carrier gas :<br>N <sub>2</sub> , 2.5<br>ml/min                 | 25                                 | nd                       | Q = 196 g/kg <sub>adsorbents</sub>                                            |                                  |
|                                                                                                                  |                                    |                                                                         |                                                                 | 50                                 |                          | Q = 258 g/kg <sub>adsorbents</sub>                                            |                                  |
|                                                                                                                  |                                    |                                                                         |                                                                 | 100                                |                          | Q = 331 g/kg <sub>adsorbents</sub>                                            |                                  |
|                                                                                                                  |                                    |                                                                         |                                                                 | 150                                |                          | Q = 308 g/kg <sub>adsorbents</sub>                                            |                                  |
|                                                                                                                  |                                    |                                                                         |                                                                 | 200                                |                          | Q = 169 g/kg <sub>adsorbents</sub>                                            |                                  |

<sup>4</sup> Vitesse superficielle : est la vitesse du fluide (gaz) à travers le milieu poreux<sup>5</sup> ft: unité de longueur US, « the foot ». 1 ft = 0,3048 m.



**Table 4 (continued)**

| Study/Topic                                                                              | Zeolites (wt.%Ag)                                    | Iodine/methyl iodide concentration (I <sub>2</sub> , CH <sub>3</sub> I) | Operating conditions                                                     | T (°C)      | R.H. (%)           | Capture performances                                                                                   |
|------------------------------------------------------------------------------------------|------------------------------------------------------|-------------------------------------------------------------------------|--------------------------------------------------------------------------|-------------|--------------------|--------------------------------------------------------------------------------------------------------|
| Belapurkar et al. 1984 <sup>18</sup><br>/Temperature influence<br>(Dehydrated zeolites)  | AgX (16)                                             | 7.5 μmol/ml CH <sub>3</sub> I                                           | Carrier gas :<br>N <sub>2</sub> , 2.5<br>ml/min                          | 25          | nd                 | Q = 447 g/kg <sub>adsorbents</sub>                                                                     |
|                                                                                          |                                                      |                                                                         |                                                                          | 50          |                    | Q = 427 g/kg <sub>adsorbents</sub>                                                                     |
|                                                                                          |                                                      |                                                                         |                                                                          | 100         |                    | Q = 400 g/kg <sub>adsorbents</sub>                                                                     |
|                                                                                          |                                                      |                                                                         |                                                                          | 150         |                    | Q = 372 g/kg <sub>adsorbents</sub>                                                                     |
| Choi et al. 2001 <sup>19</sup><br>/Silver loading influence                              | 13X (0)                                              | 2.5*10 <sup>-5</sup> mol/L CH <sub>3</sub> I                            | 4 L/min,<br>v = 0.18 m/s                                                 | 175         | Dry air            | Q = 90 g/kg <sub>adsorbents</sub>                                                                      |
|                                                                                          | AgX (10)                                             |                                                                         |                                                                          |             |                    | Q = 170 g/kg <sub>adsorbents</sub>                                                                     |
|                                                                                          | AgX (20)                                             |                                                                         |                                                                          |             |                    | Q = 210 g/kg <sub>adsorbents</sub>                                                                     |
|                                                                                          | AgX (30)                                             |                                                                         |                                                                          |             |                    | Q = 240 g/kg <sub>adsorbents</sub>                                                                     |
| Choi et al. 2001 <sup>19</sup><br>/Temperature influence                                 | AgX (10)                                             | 2.5*10 <sup>-5</sup> mol/L CH <sub>3</sub> I                            | 4 L/min,<br>v = 0.18 m/s                                                 | 100         | Dry air            | Q = 180 g/kg <sub>adsorbents</sub>                                                                     |
|                                                                                          |                                                      |                                                                         |                                                                          | 175         |                    | Q = 170 g/kg <sub>adsorbents</sub>                                                                     |
|                                                                                          |                                                      |                                                                         |                                                                          | 235         |                    | Q = 160 g/kg <sub>adsorbents</sub>                                                                     |
|                                                                                          |                                                      |                                                                         |                                                                          | 400         |                    | Q = 130 g/kg <sub>adsorbents</sub>                                                                     |
| Choi et al. 2001 <sup>19</sup><br>/Silver utilization<br>efficiency                      | AgX (10)                                             | 2.5*10 <sup>-5</sup> mol/L CH <sub>3</sub> I                            | 4 L/min,<br>v = 0.18 m/s                                                 | 150-<br>250 | Dry air            | Ag utilization efficiency :<br>100%                                                                    |
|                                                                                          | AgX (20)                                             |                                                                         |                                                                          |             |                    | Ag utilization efficiency :<br>85%                                                                     |
|                                                                                          | AgX (30)                                             |                                                                         |                                                                          |             |                    | Ag utilization efficiency :<br>68%                                                                     |
| Choi et al. 2003 <sup>20</sup><br>/NO <sub>2</sub> poisoning<br>influence                | AgX (10)                                             | NO <sub>2</sub> (200 ppm)                                               | 4 L/min,<br>v = 0.18 m/s                                                 | 175         | 50                 | E = 99.9%. DF = 10 <sup>4</sup><br>E = 99%. DF = 10 <sup>2</sup><br>(after 16 months of<br>exposition) |
| Haefner et al 2010 <sup>21</sup><br>/Zeolite nature                                      | IONEX Ag-900<br>(commercial)                         | 33.3 ppm CH <sub>3</sub> I                                              | 1200 ml/min,<br>14.1 ft/min,<br>[NO <sub>2</sub> ] = [NO] =<br>833 ppm   | 150         | 2.5                | Q = 71.4 g/kg <sub>adsorbents</sub>                                                                    |
|                                                                                          | Ag0MOR                                               |                                                                         |                                                                          |             | H2O                | Q = 59.5 g/kg <sub>adsorbents</sub>                                                                    |
| Soelberg et al. 2012 <sup>22</sup><br>/Initial I <sub>2</sub> concentration<br>influence | Ag0MOR (16.7)                                        | 1.6 ppmv I <sub>2</sub>                                                 | Carrier gas N <sub>2</sub> ,<br>[NO <sub>2</sub> ] = [NO] =<br>10000 ppm | 150         | 1.5<br>wt.%<br>H2O | Q = 33 g/kg <sub>adsorbents</sub>                                                                      |
|                                                                                          |                                                      | 14.4 ppmv I <sub>2</sub>                                                |                                                                          |             |                    | Q = 80 g/kg <sub>adsorbents</sub>                                                                      |
|                                                                                          |                                                      | 49.2 ppmv I <sub>2</sub>                                                |                                                                          |             |                    | Q = 111 g/kg <sub>adsorbents</sub>                                                                     |
| Nenoff et al. 2014 <sup>23</sup>                                                         | Ag0MOR<br>IONEX Ag-900<br>(commercial)               | 57 ppm CH <sub>3</sub> I                                                | 0.73 L/min,<br>[NO <sub>2</sub> ] = [NO] =<br>800 ppm                    | 150         | 1.8<br>wt.%<br>H2O | Q = 52 g/kg <sub>adsorbents</sub><br>E = 55%                                                           |
| Bruffey et al. 2014 <sup>24</sup>                                                        | Ag0MOR<br>(9.5 wt.%)<br>IONEX Ag-900<br>(commercial) | 50 ppm I <sub>2</sub>                                                   | Superficial<br>velocity<br>v = 10 m/min                                  | 150         | nd                 | Q = 72 g/kg <sub>adsorbents</sub>                                                                      |
| Bruffey et al. 2014 <sup>24</sup>                                                        | Ag0MOR<br>(9.5 wt.%)<br>IONEX Ag-900<br>(commercial) | 50 ppm I <sub>2</sub>                                                   | Superficial<br>velocity<br>v = 10 m/min                                  | 150         | nd                 | Q = 72 g/kg <sub>adsorbents</sub>                                                                      |

**Table 5 (continued)**

| Study/Topic                                                                                      | Zeolites (wt.%Ag)                                       | Iodine/methyl iodide concentration (I <sub>2</sub> , CH <sub>3</sub> I) | Operating conditions                                             | T (°C) | R.H. (%)                      | Capture performances               |
|--------------------------------------------------------------------------------------------------|---------------------------------------------------------|-------------------------------------------------------------------------|------------------------------------------------------------------|--------|-------------------------------|------------------------------------|
| Bruffey et al. 2014 <sup>25</sup> /NO <sub>2</sub> poisoning influence                           | Ag0MOR (9.5 %m)<br>IONEX Ag-900 (commercial)            | 50 ppm CH <sub>3</sub> I                                                | [NO <sub>2</sub> ] = [NO] = 10000 ppm,<br>v = 4.3 m/min          | 165    | [H <sub>2</sub> O] = 6000 ppm | Q = 50 g/kg <sub>adsorbents</sub>  |
|                                                                                                  |                                                         |                                                                         | [NO <sub>2</sub> ] = [NO] = 10000 ppm,<br>v = 4.3 m/min          |        | [H <sub>2</sub> O] < 10 ppm   | Q = 56 g/kg <sub>adsorbents</sub>  |
|                                                                                                  |                                                         | 50 ppm I <sub>2</sub>                                                   | [NO <sub>2</sub> ] = [NO] = 0 ppm,<br>v = 4.3 m/min              | 150    | [H <sub>2</sub> O] < 10 ppm   | Q = 125 g/kg <sub>adsorbents</sub> |
|                                                                                                  |                                                         |                                                                         | v = 10 m/min                                                     |        | [H <sub>2</sub> O] = 0 ppm    | Q = 87 g/kg <sub>adsorbents</sub>  |
| Cheng et al. 2015 <sup>26</sup> / Silver loading influence                                       | 13X (0)<br><br>AgX (10)<br><br>AgX (15)<br><br>AgX (20) | 2.5 ml/h I <sub>2</sub>                                                 | Carrier gas: He, 69.3 ml/min, 4mm, sphere                        | 250    | Air sec                       | DF = 10 <sup>2.2</sup>             |
|                                                                                                  |                                                         |                                                                         |                                                                  | 650    |                               | DF = 10 <sup>1.1</sup>             |
|                                                                                                  |                                                         |                                                                         |                                                                  | 250    |                               | DF = 10 <sup>2.7</sup>             |
|                                                                                                  |                                                         |                                                                         |                                                                  | 650    |                               | DF = 10 <sup>1.5</sup>             |
|                                                                                                  |                                                         |                                                                         |                                                                  | 250    |                               | DF = 10 <sup>3.4</sup>             |
|                                                                                                  |                                                         |                                                                         |                                                                  | 650    |                               | DF = 10 <sup>3.0</sup>             |
|                                                                                                  |                                                         |                                                                         |                                                                  | 250    |                               | DF = 10 <sup>3.4</sup>             |
|                                                                                                  |                                                         |                                                                         |                                                                  | 650    |                               | DF = 10 <sup>2.9</sup>             |
| Bruffey et al. 2016 <sup>27</sup>                                                                | Ag0MOR (11.9 wt.%)<br>IONEX Ag-900 (commercial)         | 40 ppb CH <sub>3</sub> I                                                | Carrier gas: N <sub>2</sub> ,<br>v =10 m/min, pellet (d = 16 cm) | 150    | nd                            | DF > 190                           |
| Nan et al. 2017 <sup>28</sup>                                                                    | Ag0MOR (12) (commercial)                                | nd                                                                      | Pellets (d=1.6mm)                                                | 150    | nd                            | E = 88%                            |
| Abney et al. 2017 <sup>29</sup>                                                                  | Ag0MOR (11.9 wt.%)<br>IONEX Ag-900 (commercial)         | 50 ppmv I <sub>2</sub>                                                  | Pellets (d = 1.6 mm)                                             | 150    | Dry air                       | ND                                 |
| Azambre et al. 2017 <sup>30</sup><br>Chebbi et al. 2017 <sup>31</sup> / Silver loading influence | AgY (9.1)                                               | 1333 ppm                                                                | Carrier gas: Ar,<br>150 mL/min                                   | 100    | nd                            | Q <sub>sat</sub> (mg/g) = 87       |
|                                                                                                  | AgY (16.8)                                              |                                                                         |                                                                  |        |                               | Q <sub>sat</sub> (mg/g) = 175      |
|                                                                                                  | AgY (22.8)                                              |                                                                         |                                                                  |        |                               | Q <sub>sat</sub> (mg/g) = 223      |
|                                                                                                  | 13X (10% m Na)                                          |                                                                         |                                                                  |        |                               | Q <sub>sat</sub> (mg/g) = 92       |
|                                                                                                  | AgX (7.3)                                               |                                                                         |                                                                  |        |                               | Q <sub>sat</sub> (mg/g) = 149      |
|                                                                                                  | AgX (23.4)                                              |                                                                         |                                                                  |        |                               | Q <sub>sat</sub> (mg/g) = 234      |
|                                                                                                  | AgX (35) commercial                                     |                                                                         |                                                                  |        |                               | Q <sub>sat</sub> (mg/g) = 267      |
|                                                                                                  | AgMOR (5.9)                                             |                                                                         |                                                                  |        |                               | Q <sub>sat</sub> (mg/g) = 83       |
|                                                                                                  | AgMOR (7.3)                                             |                                                                         |                                                                  |        |                               | Q <sub>sat</sub> (mg/g) = 120      |
|                                                                                                  | AgMFI (9)                                               |                                                                         |                                                                  |        |                               | Q <sub>sat</sub> (mg/g) = 85       |
| AgFER (4.2)                                                                                      | Q <sub>sat</sub> (mg/g) = 64                            |                                                                         |                                                                  |        |                               |                                    |
| Ag*BEA (3.4)                                                                                     | Q <sub>sat</sub> (mg/g) = 46                            |                                                                         |                                                                  |        |                               |                                    |

## Notes and references

- 1 H. Deuber and J.G. Wilhelm, *Proceedings of the 17th DOE Nuclear Air Cleaning Conference, Conf. 820833, U.S. Department of Energy, The Harvard Air Cleaning Laboratory, Denver, Colorado, 1982, 248–277.*
- 2 S. Kitani, T. Noro, T. Kohara, S. Kitani, T. Noro and T. Kohara, *Journal of Nuclear Science and Technology, 1971, 9 (4), 197–202.*
- 3 H. Deuber, *Nuclear Technology, 1986, 72, 44–48.*
- 4 V. R. Deitz, *Carbon, 1987, 25, 31–38.*
- 5 S. W. Park, W. K. Lee and H. Moon, *Separations Technology, 1993, 3, 133–142.*
- 6 G. Park, I. Kim, J. K. Lee, S. K. Ryu and J. H. Kim, *Science, 2001, 2, 9–14.*
- 7 C. M. González-García, J. F. González and S. Román, *Fuel Processing Technology, 2011, 92, 247–252.*
- 8 V. R. Deitz and C. H. Blachly, *US4016242A, 1977.*
- 9 P. Decourcière, *Iodine removal from gaseous effluents in the nuclear industry, 1981.*
- 10 I. Qi-Dong and H. Sui-yuang, *Proceedings of the 18th DOE Nuclear Airborne Waste Management and Air Cleaning Conference, Conf. 840806, U.S. Department of Energy, The Harvard Air Cleaning Laboratory, Baltimore, Maryland, 1984, 78–92.*
- 11 C. C. Chien, Y. P. Huang, W. C. Wang, J. H. Chao and Y. Y. Wei, *Clean - Soil, Air, Water, 2011, 39, 103–108.*
- 12 J. Zhou, S. Hao, L. Gao and Y. Zhang, *Annals of Nuclear Energy, 2014, 72, 237–241.*
- 13 D. T. Pence, F. A. Duce and W. J. Maeck, *Proceedings of the 11th AEC Nuclear Air Cleaning Conference, Conf. 700816, The Harvard Air Cleaning Laboratory, Richland, WA, 1970, 581–599.*
- 14 A. G. Evans, *Proceedings of the 15th DOE Nuclear Air Cleaning Conference, Conf. 780819, 1, The Harvard Air Cleaning Laboratory, Cambridge, Massachusetts, 1978, 416–427.*
- 15 D. W. Holladay, *ORNL/TM-6350, Oak Ridge National Laboratory, Oak Ridge, TN, 1979.*
- 16 E. R. Vance and D. K. Agrawal, *Journal of Materials Science, 1982, 17, 1889–1894.*
- 17 R. D. Scheele, L. L. Burger and C. L. Matsuzaki, *PNL-4489, Pacific Northwest Laboratory, Richland, Washington, 1983.*
- 18 A. D. Belapurkar, K. A. Rao, N. M. Gupta and R. M. Iyer, *Surface Technology, 1984, 21, 263–272.*
- 19 B. S. Choi, G. Il Park, J. H. Kim, J. W. Lee and S. K. Ryu, *Adsorption, 2001, 7, 91–103.*
- 20 B. S. Choi, G. Il Park, J. W. Lee, H. Y. Yang and S. K. Ryu, *Journal of Radioanalytical and Nuclear Chemistry, 2003, 256, 19–26.*
- 21 D. R. Haefner and T. L. Watson, *Summary of FY 2010 Iodine Capture Studies at the INL, Idaho National Laboratory, Idaho Falls, ID, 2010.*
- 22 N. Soelberg and T. Watson, *Iodine Sorbent Performance in FY 2012 Deep Bed Tests, 2012.*
- 23 T. M. Nenoff, M. A. Rodriguez, N. R. Soelberg and K. W. Chapman, *Microporous and Mesoporous Materials, 2014, 200, 297–303.*
- 24 S. H. Bruffey, R. T. Jubin, K. K. Anderson and J. F. Walker, *Fuel Cycle Research & Development, Oak Ridge National Laboratory, 30 April, 2014, FCRD-SWF-2014-000465, ORNL/LTR-2014/153.*
- 25 S. H. Bruffey and R. T. Jubin, *Fuel Cycle Research and Development, Oak Ridge national laboratory, 30 September, 2014, FCRD-SWF-2014-000280, ORNL/LRT-2014/482, 2014.*
- 26 Q. Cheng, W. Yang, Z. Li, Q. Zhu, T. Chu, D. He and C. Fang, *Journal of Radioanalytical and Nuclear Chemistry, 2015, 303, 1883–1889.*
- 27 S. H. Bruffey, R. T. Jubin and J. A. Jordan, *Procedia Chemistry, 2016, 21, 293–299.*
- 28 Y. Nan, L. Tavlarides and D. W. DePaoli, *AIChE Journal, 2017, 63, 1024–1035.*
- 29 C. W. Abney, Y. Nan and L. L. Tavlarides, *Industrial and Engineering Chemistry Research, 2017, 56, 4837–4846.*
- 30 B. Azambre and M. Chebbi, *ACS Applied Materials and Interfaces, 2017, 9, 25194–25203.*
- 31 M. Chebbi, B. Azambre, L. Cantrel, M. Huvé and T. Albiol, *Microporous and Mesoporous Materials, 2017, 244, 137–150.*
